# Supplementary material for: Bioprospecting Fluorescent Pseudomonas from the Brazilian Amazon for the Biocontrol of Signal Grass Foliar Blight
Source: MDPI journal article supplement (doi:10.3390/agronomy12061395), 2022-06-10
Supplement: s1 [file s1]

**Supplementary material S2.** *Rhizoctonia solani* AG-1 IA mycelial growth and sclerotia germination inhibition by fluorescent *Pseudomonas* isolates.

| Strains | Mycelial growth inhibition |   | Sclerotia germination inhibition |   |
|---------|----------------------------|---|----------------------------------|---|
|         | (%) <sup>a, b, c</sup>     |   | (%) <sup>a, b, c</sup>           |   |
| Amana   | 41.83                      | a | 65.0                             | d |
| Poti    | 32.47                      | b | 79.2                             | c |
| Yara    | 26.14                      | c | 100.0                            | a |
| Ebira   | 24.14                      | c | 87.5                             | b |
| Moara   | 23.73                      | c | 67.5                             | d |
| Arati   | 23.58                      | c | 95.8                             | a |
| Inara   | 23.02                      | c | 99.2                             | a |
| Membira | 22.45                      | c | 100.0                            | a |
| Anahi   | 22.25                      | c | 88.3                             | b |
| Raira   | 22.18                      | c | 100.0                            | a |
| Tiba    | 22                         | c | 95.0                             | a |
| Rudá    | 21.85                      | c | 88.3                             | b |
| Marani  | 21.75                      | c | 100.0                            | a |
| Arani   | 21.12                      | d | 85.0                             | c |
| Tacira  | 20.78                      | d | 100.0                            | a |
| Nadi    | 20.65                      | d | 90.0                             | b |
| Ocara   | 19.98                      | d | 100.0                            | a |
| Yami    | 18.95                      | d | 10.8                             | f |
| Acemira | 17.06                      | d | 84.2                             | c |
| Abati   | 9.32                       | e | 91.7                             | b |
| Iracema | 8.6                        | e | 90.8                             | b |
| Anauê   | 7.39                       | e | 47.5                             | e |
| Joaci   | 6.32                       | e | 72.5                             | d |
| Juçara  | 5.98                       | e | 81.7                             | c |

<sup>a</sup> The individual mean for inhibition of mycelial growth and sclerotia germination for each *Pseudomonas* strain was obtained from five or four reps of the experimental units, respectively, two replicates of the experiments, and three isolates of *R. solani* AG-1 IA combined (MTUB01C, MTUB04E and MTUB05A).

<sup>b</sup>  $F_{strains} = 38.17^{***}$  for mycelial growth inhibition and  $F_{strains} = 35.16^{***}$  for sclerotia germination inhibition, both significant at  $p \leq 0.001$ .

<sup>c</sup> Means followed by the same letter are not significantly different by the Scott Knott test at  $p \leq 0.05$ .
